# Supplementary material for: The Relationship Between Relative Solvent Accessibility and Evolutionary Rate in Protein Evolution
Source: Oxford University Press journal article supplement (doi:10.1534/genetics.111.128025), 2011-04-06
Supplement: figures1.pdf [file figures1.pdf]

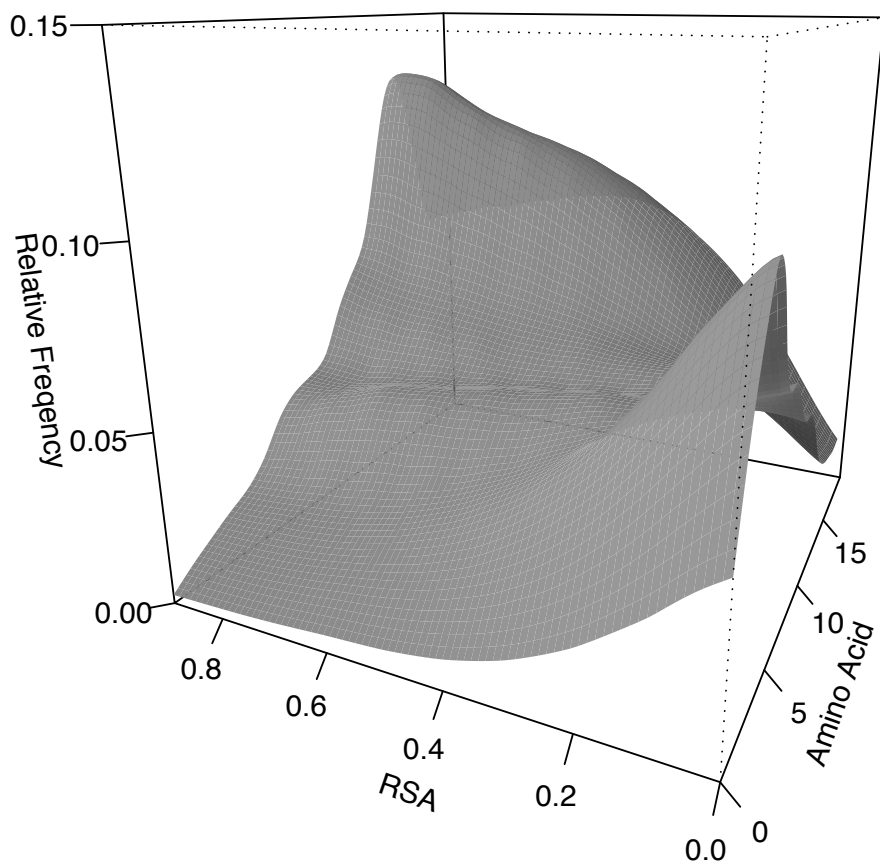

FIGURE S1.—Relative frequencies of amino acids across 525 yeast proteins, binned by RSA and ordered by decreasing hydrophobicity. Cysteine and methionine are omitted. Due to their specialized function, their average frequencies across all bins were 1.5% and 0.6%, respectively.
