# Supplementary material for: The Relationship Between Relative Solvent Accessibility and Evolutionary Rate in Protein Evolution
Source: Oxford University Press journal article supplement (doi:10.1534/genetics.111.128025), 2011-04-06
Supplement: figures2.pdf [file figures2.pdf]

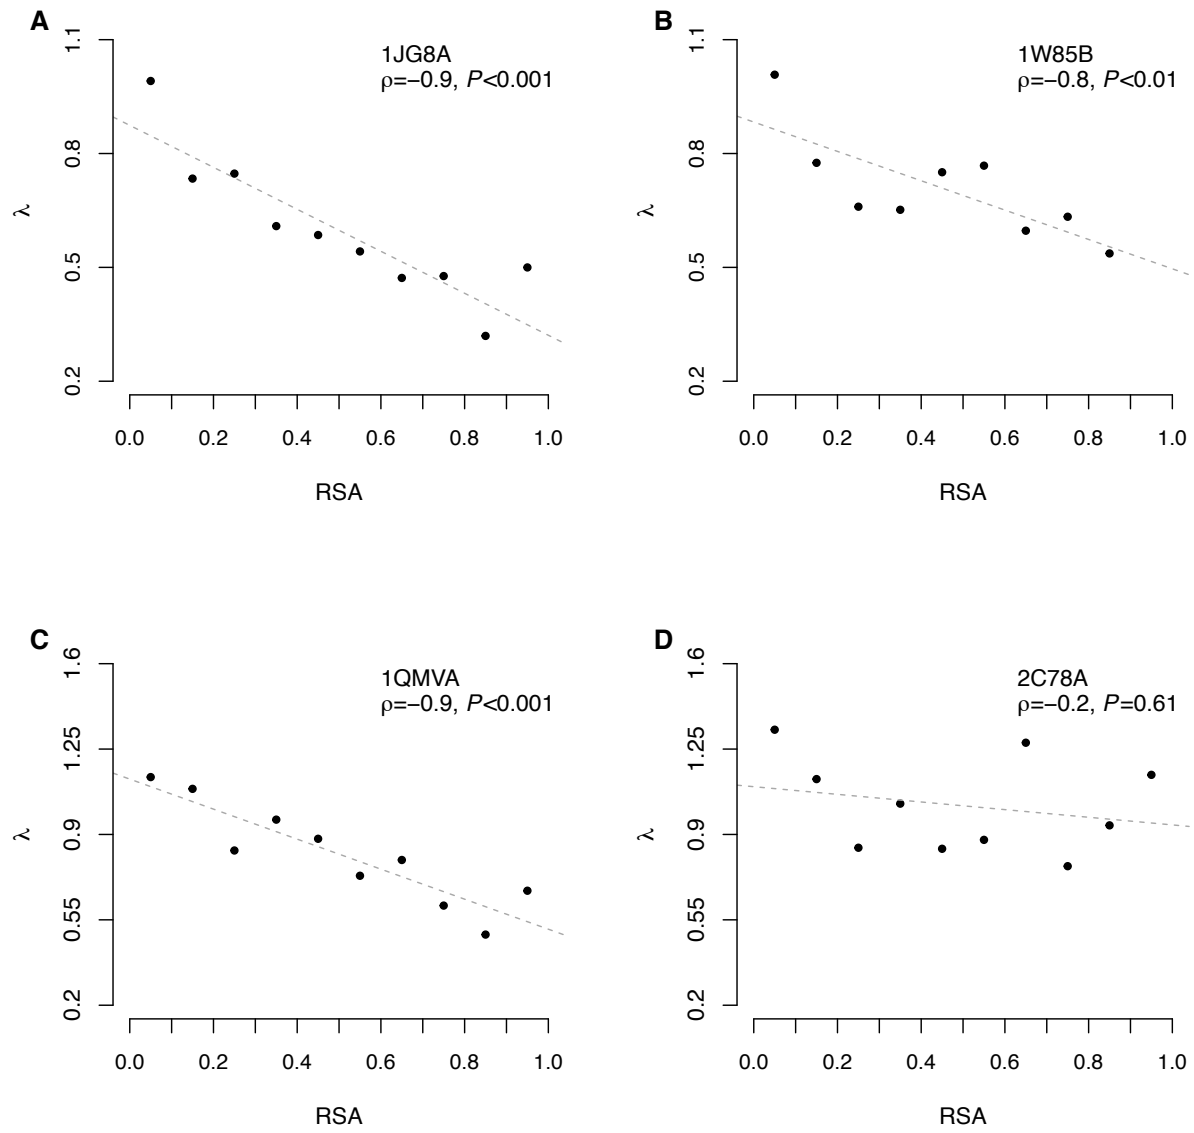FIGURE S2.—The exponential parameter  $\lambda$  as a function of RSA, for four different protein structures.
