# Supplementary material for: The Relationship Between Relative Solvent Accessibility and Evolutionary Rate in Protein Evolution
Source: Oxford University Press journal article supplement (doi:10.1534/genetics.111.128025), 2011-04-06
Supplement: figures3.pdf [file figures3.pdf]

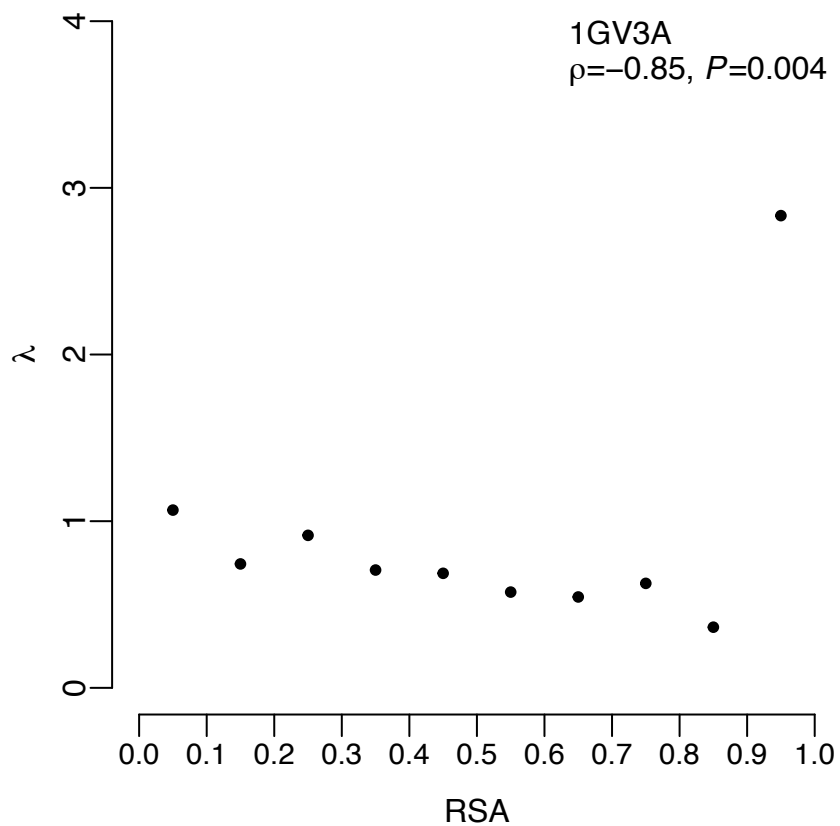

FIGURE S3.—The protein manganese superoxide dismutase (PDF identifier 1GV3, chain A) shows a clear linear decrease of  $\lambda$  with RSA, except for the highest RSA bin. Even though a non-parametric correlation analysis shows a strong negative correlation, a linear model (dashed line) infers a positive slope because of the one outlying data point.
