# Supplementary material for: The Relationship Between Relative Solvent Accessibility and Evolutionary Rate in Protein Evolution
Source: Oxford University Press journal article supplement (doi:10.1534/genetics.111.128025), 2011-04-06
Supplement: files1.zip [file files1.zip]

```

In[1]:= s[r_] := -r / 100 + .01
FixAB[r_, N_] := (1 - Exp[2 s[r]]) / (1 - Exp[2 N * s[r]])
FixBA[r_, N_] := (1 - Exp[-2 s[r]]) / (1 - Exp[-2 N * s[r]])
K[r_, N_, U_] :=
  U * N (FixAB[r, N] * FixBA[r, N] + FixBA[r, N] * FixAB[r, N]) / (FixAB[r, N] + FixBA[r, N])

s[r_] := Exp[-(r) + Log[1 / 100]];
Plot[s[r], {r, 0, 1}]

```

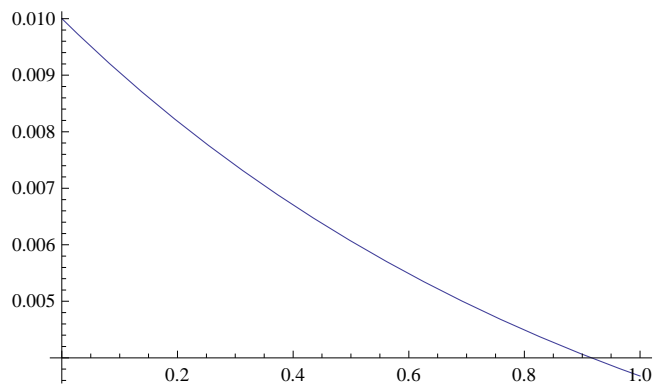

```
Limit[FixAB[r, 100], r -> 1]
```

```
0.01
```

```

In[17]:= s[r_] := -r / 50 000 + .000015
Plot[s[r], {r, 0, 1}]
Linear = LogPlot[K[r, 5 * 10^6, 3.3 * 10^-10], {r, 0, 1}, PlotStyle -> Red,
  PlotRange -> {{0, 1}, {10^-90, 1}}, Frame -> {{True, False}, {True, False}},
  FrameLabel -> {r, K}, Axes -> {False, False}, PlotLabel -> "Predicted Evolutionary Rate"]
g = OpenWrite["C:\Users\dc476\Desktop\linear.txt", FormatType -> OutputForm]
Do[Write[g, r, " ", NumberForm[K[r, 5 * 10^6, 3.3 * 10^-10],
  NumberFormat -> (SequenceForm[#1, "e", #3] &)], " "], {r, 0, 1, .001}]
Close[
g]

```

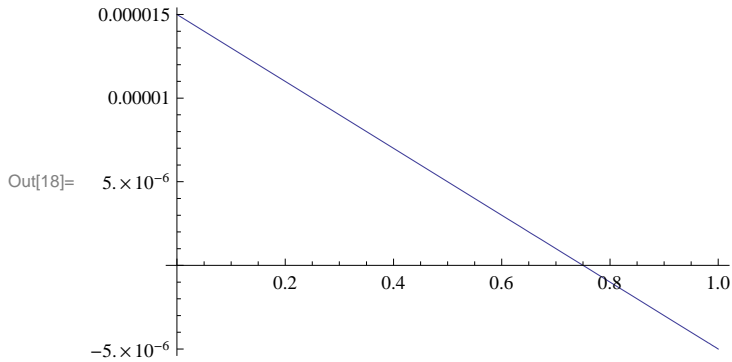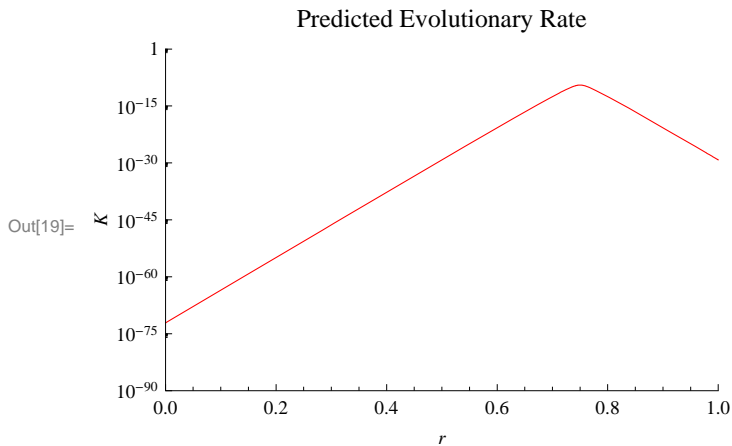

```
Out[20]= OutputStream[C:\Users\dc476\Desktop\linear.txt, 19]
```

Power::infy : Infinite expression  $\frac{1}{0.}$  encountered. >>

$\infty$ ::indet : Indeterminate expression 0. ComplexInfinity encountered. >>

```
Out[22]= C:\Users\dc476\Desktop\linear.txt
```

```

In[23]:= s[r_] := Exp[-(r) + Log[1 / 50 000]];
Plot[s[r], {r, 0, 1}]
Exponential = LogPlot[K[r, 5 * 10^6, 3.3 * 10^-10],
  {r, 0, 1}, PlotStyle -> Black, PlotRange -> {{0, 1}, {10^-90, 1}},
  Frame -> {{True, False}, {True, False}}, FrameLabel -> {r, K}, Axes -> {False, False}]
g = OpenWrite["C:\Users\dc476\Desktop\exponential.txt", FormatType -> OutputForm]
Do[Write[g, r, " ", NumberForm[K[r, 5 * 10^6, 3.3 * 10^-10],
  NumberFormat -> (SequenceForm[#1, "e", #3] &)], " "], {r, 0, 1, .001}]
Close[
  g]

```

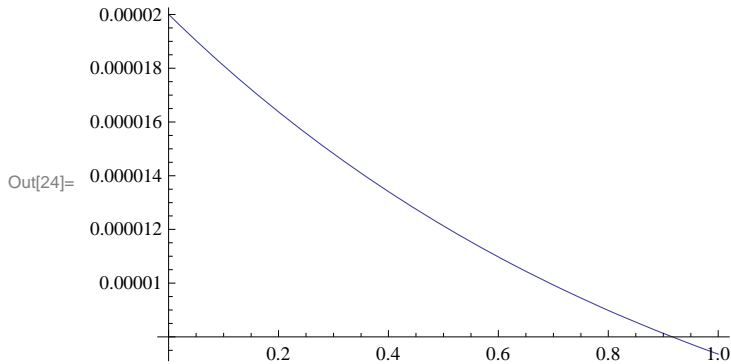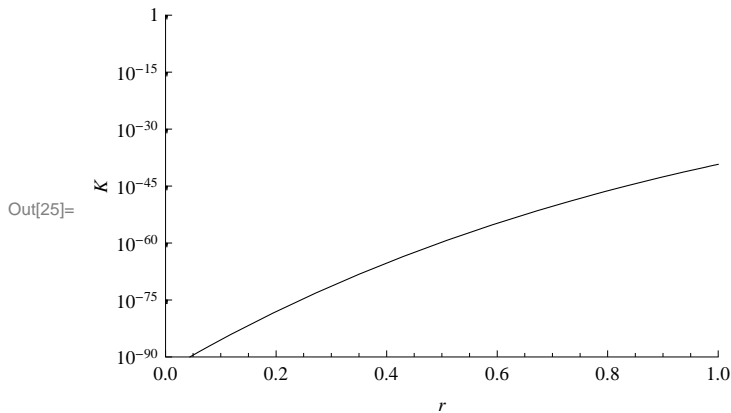

```
Out[26]= OutputStream[C:\Users\dc476\Desktop\exponential.txt, 20]
```

```
Out[28]= C:\Users\dc476\Desktop\exponential.txt
```

```

In[42]:= s[r_] := Log[2 - r] (1 / (55 000 * Log[2]));
Plot[s[r], {r, .01, 1}]
Logarithmic = LogPlot[K[r, 5 * 10^6, 3.3 * 10^-10],
  {r, 0, 1}, PlotStyle -> Blue, PlotRange -> {{0, 1}, {10^-90, 1}},
  Frame -> {{True, False}, {True, False}}, FrameLabel -> {r, K}, Axes -> {False, False}]
g = OpenWrite["C:\Users\dc476\Desktop\logarithmic.txt", FormatType -> OutputForm]
Do[Write[g, r, " ", NumberForm[K[r, 5 * 10^6, 3.3 * 10^-10],
  NumberFormat -> (SequenceForm[#1, "e", #3] &)], " "], {r, 0, 1, .001}]
Close[
  g]

```

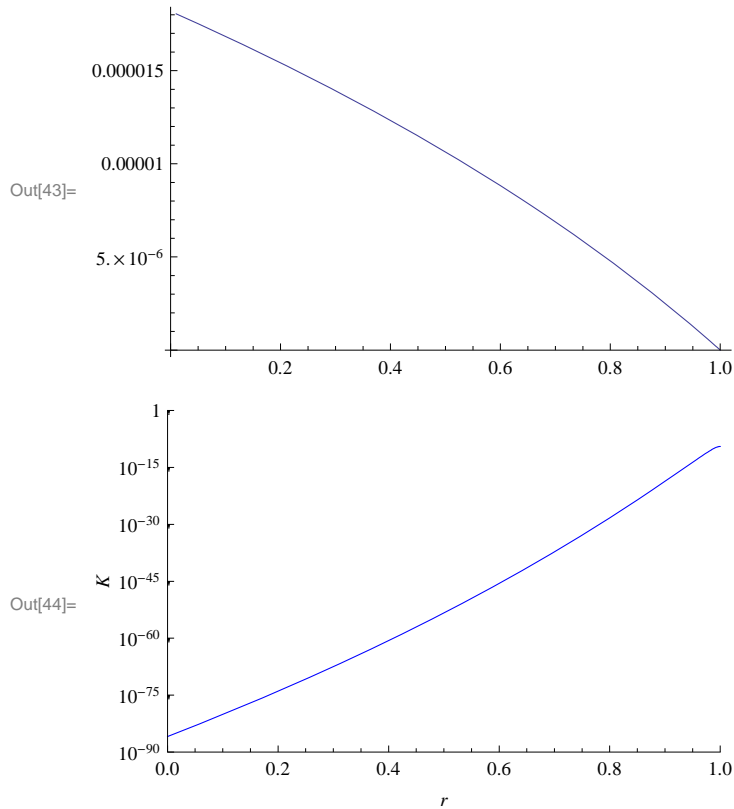

Out[45]= `OutputStream[C:\Users\dc476\Desktop\logarithmic.txt, 23]`

Power::infy : Infinite expression  $\frac{1}{0}$  encountered. >>

$\infty$ ::indet : Indeterminate expression 0. ComplexInfinity encountered. >>

Power::infy : Infinite expression  $\frac{1}{0}$  encountered. >>

$\infty$ ::indet : Indeterminate expression 0. ComplexInfinity encountered. >>

Power::infy : Infinite expression  $\frac{1}{0}$  encountered. >>

General::stop : Further output of Power::infy will be suppressed during this calculation. >>

$\infty$ ::indet : Indeterminate expression 0. ComplexInfinity encountered. >>

General::stop : Further output of  $\infty$ ::indet will be suppressed during this calculation. >>

Out[47]= `C:\Users\dc476\Desktop\logarithmic.txt`

In[48]:= Show[{Linear, Exponential, Logarithmic}]

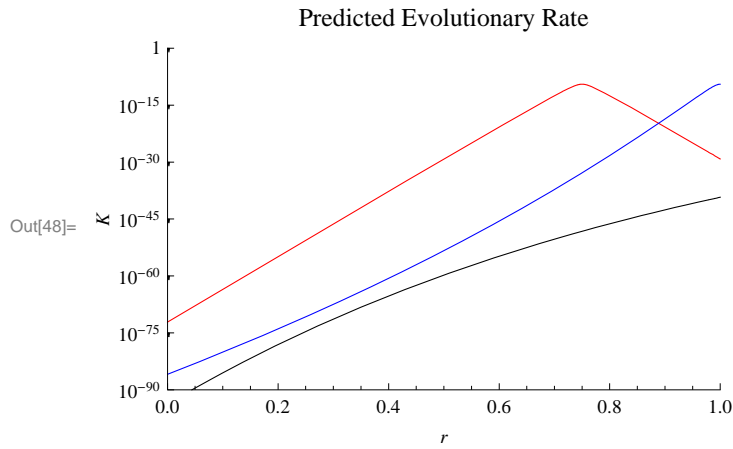

Show[{Linear, Quadratic, Exponential, Logarithmic}]

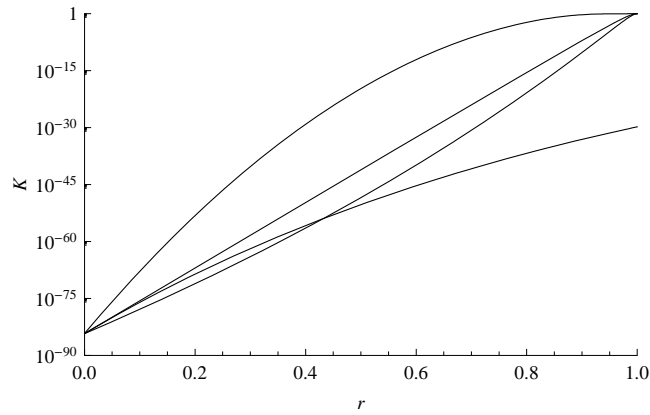

Factor[2 ((1 - Exp[2 s]) / (1 - Exp[2 N s]) \* (1 - Exp[-2 s]) / (1 - Exp[-2 N s])) /  
((1 - Exp[2 s]) / (1 - Exp[2 N s]) + (1 - Exp[-2 s]) / (1 - Exp[-2 N s]))]

$$\frac{2 e^{2 N s} (-1 + e^s) (1 + e^s)}{(-1 + e^{N s}) (1 + e^{N s}) (e^{2 s} + e^{2 N s})}$$

Simplify[ $\frac{2 e^{2 N s} (-1 + e^s) (1 + e^s)}{(-1 + e^{N s}) (1 + e^{N s}) (e^{2 s} + e^{2 N s})}$ ]

$$\frac{2 e^{2 N s} (-1 + e^s) (1 + e^s)}{(-1 + e^{2 N s}) (e^{2 s} + e^{2 N s})}$$

Factor[D[ $\frac{2 e^{2 N s} (-1 + e^s) (1 + e^s)}{(-1 + e^{2 N s}) (e^{2 s} + e^{2 N s})}$ , s]]

$$-\frac{4 e^{2 N s} (e^{2 s} - e^{2 s + 4 N s} - e^{2 s} N + e^{4 s} N - e^{4 N s} N + e^{2 s + 4 N s} N)}{(-1 + e^{N s})^2 (1 + e^{N s})^2 (e^{2 s} + e^{2 N s})^2}$$

$$\text{Simplify}\left[D\left[\frac{2 e^{2 N s} (-1 + e^s) (1 + e^s)}{(-1 + e^{2 N s}) (e^{2 s} + e^{2 N s})}, s\right]\right]$$

$$\frac{4 e^{2 N s} (-e^{2 s} (-1 + N) + e^{2 s + 4 N s} (-1 + N) + e^{4 s} N - e^{4 N s} N)}{(-1 + e^{2 N s})^2 (e^{2 s} + e^{2 N s})^2}$$

$$\text{Simplify}\left[D\left[D\left[\frac{2 e^{2 N s} (-1 + e^s) (1 + e^s)}{(-1 + e^{2 N s}) (e^{2 s} + e^{2 N s})}, s\right], s\right]\right]$$

$$\text{Factor}\left[D\left[D\left[\frac{2 e^{2 N s} (-1 + e^s) (1 + e^s)}{(-1 + e^{2 N s}) (e^{2 s} + e^{2 N s})}, s\right], s\right]\right]$$

$$\frac{1}{(-1 + e^{2 N s})^3 (e^{2 s} + e^{2 N s})^3} \\ 8 e^{2 N s} (-e^{4 s} (-1 + N)^2 + e^{2 (1+N) s} (-1 + N)^2 - e^{4 s + 6 N s} (-1 + N)^2 + e^{2 s + 8 N s} (-1 + N)^2 + \\ e^{6 s} N^2 - e^{6 N s} N^2 - e^{8 N s} N^2 + e^{2 (3+N) s} N^2 + e^{2 s + 4 N s} (-1 + 6 N - 6 N^2) + \\ e^{2 (2+N) s} (1 + 2 N - 2 N^2) + e^{2 s + 6 N s} (-1 - 2 N + 2 N^2) + e^{4 (1+N) s} (1 - 6 N + 6 N^2)) \\ (8 e^{2 N s} (-e^{4 s} + e^{2 s + 2 N s} + e^{4 s + 2 N s} - e^{2 s + 4 N s} + e^{4 s + 4 N s} - e^{2 s + 6 N s} - e^{4 s + 6 N s} + e^{2 s + 8 N s} + 2 e^{4 s} N - \\ 2 e^{2 s + 2 N s} N + 2 e^{4 s + 2 N s} N + 6 e^{2 s + 4 N s} N - 6 e^{4 s + 4 N s} N - 2 e^{2 s + 6 N s} N + 2 e^{4 s + 6 N s} N - 2 e^{2 s + 8 N s} N - \\ e^{4 s} N^2 + e^{6 s} N^2 - e^{6 N s} N^2 - e^{8 N s} N^2 + e^{2 s + 2 N s} N^2 - 2 e^{4 s + 2 N s} N^2 + e^{6 s + 2 N s} N^2 - 6 e^{2 s + 4 N s} N^2 + \\ 6 e^{4 s + 4 N s} N^2 + 2 e^{2 s + 6 N s} N^2 - e^{4 s + 6 N s} N^2 + e^{2 s + 8 N s} N^2)) / ((-1 + e^{N s})^3 (1 + e^{N s})^3 (e^{2 s} + e^{2 N s})^3)$$

$$\text{Solve}\left[\begin{aligned} & (8 e^{2 N s} (-e^{4 s} (-1 + N)^2 + e^{2 (1+N) s} (-1 + N)^2 - e^{4 s + 6 N s} (-1 + N)^2 + e^{2 s + 8 N s} (-1 + N)^2 + e^{6 s} N^2 - e^{6 N s} N^2 - e^{8 N s} \\ & N^2 + e^{2 (3+N) s} N^2 + e^{2 s + 4 N s} (-1 + 6 N - 6 N^2) + e^{2 (2+N) s} (1 + 2 N - 2 N^2) + \\ & e^{2 s + 6 N s} (-1 - 2 N + 2 N^2) + e^{4 (1+N) s} (1 - 6 N + 6 N^2))) / ((-1 + e^{2 N s})^3 (e^{2 s} + e^{2 N s})^3) = 0, s \end{aligned}\right]$$

Solve::tdep: The equations appear to involve the variables to be solved for in an essentially non-algebraic way. >>

$$\text{Solve}\left[\frac{1}{(-1 + e^{2 N s})^3 (e^{2 s} + e^{2 N s})^3} \right. \\ 8 e^{2 N s} (-e^{4 s} (-1 + N)^2 + e^{2 (1+N) s} (-1 + N)^2 - e^{4 s + 6 N s} (-1 + N)^2 + e^{2 s + 8 N s} (-1 + N)^2 + \\ e^{6 s} N^2 - e^{6 N s} N^2 - e^{8 N s} N^2 + e^{2 (3+N) s} N^2 + e^{2 s + 4 N s} (-1 + 6 N - 6 N^2) + \\ \left. e^{2 (2+N) s} (1 + 2 N - 2 N^2) + e^{2 s + 6 N s} (-1 - 2 N + 2 N^2) + e^{4 (1+N) s} (1 - 6 N + 6 N^2) = 0, s\right]$$

$$\text{FindRoot}\left[D\left[D\left[\frac{2 e^{2 N s} (-1 + e^s) (1 + e^s)}{(-1 + e^{2 N s}) (e^{2 s} + e^{2 N s})}, s\right], s\right], \{s, 0\}\right]$$

FindRoot::nnum: The function value

$$\left\{ \frac{4.271828^{0.0 N}}{(-1. + 2.71828^{0. N})(1. + \ll 18 \gg^{0. N})} - \frac{16. \ll 18 \gg^{\ll 3 \gg + \ll 1 \gg} N}{(-1. + \ll 1 \gg)^2 (1. + \ll 1 \gg)} + \frac{\ll 1 \gg}{\ll 1 \gg} + \ll 6 \gg + \ll 1 \gg + \frac{\ll 1 \gg}{\ll 1 \gg} \right. \\ \left. + \ll 2 \gg \right\} \text{ is not a list of numbers with dimensions } \{1\} \text{ at } \{s\} = \{0\}. >>$$

$$\text{FindRoot}\left[D_s D_s \frac{2 e^{2 N s} (-1 + e^s) (1 + e^s)}{(-1 + e^{2 N s}) (e^{2 s} + e^{2 N s})}, \{s, 0\}\right]$$
