# Supplementary material for: The Relationship Between Relative Solvent Accessibility and Evolutionary Rate in Protein Evolution
Source: Oxford University Press journal article supplement (doi:10.1534/genetics.111.128025), 2011-04-06
Supplement: tables1.pdf [file tables1.pdf]

**TABLE S1****Fitted constants  $c_1$  and  $c_2$  for protein structures highlighted in Figure 5.**

| PDB id | $c_1$ | $c_2$ |
|--------|-------|-------|
| 1GV3A  | 0.53  | 0.68  |
| 1JG8A  | 0.90  | -0.55 |
| 1QMVA  | 1.16  | -0.62 |
| 1S4OA  | 0.90  | -0.57 |
| 1W85B  | 0.90  | -0.39 |
| 2C78A  | 1.10  | -0.16 |
| 2GLFA  | 0.87  | -0.37 |
