# Supplementary figures and images for: The Relationship Between Relative Solvent Accessibility and Evolutionary Rate in Protein Evolution
Source: Oxford University Press journal article supplement (doi:10.1534/genetics.111.128025), 2011-04-06

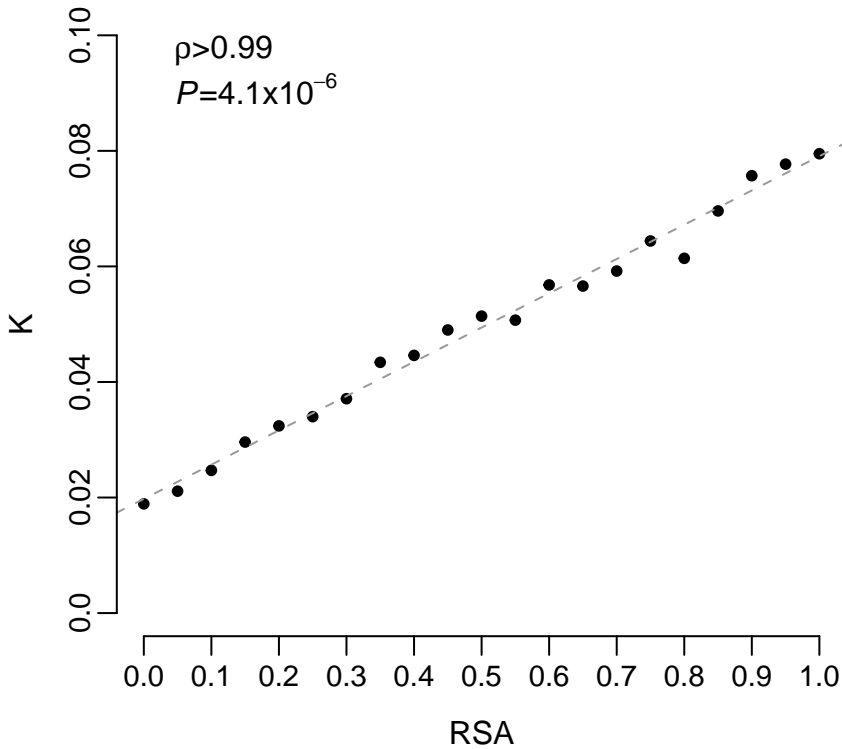

Supplement: files1.zip [file files1.zip]

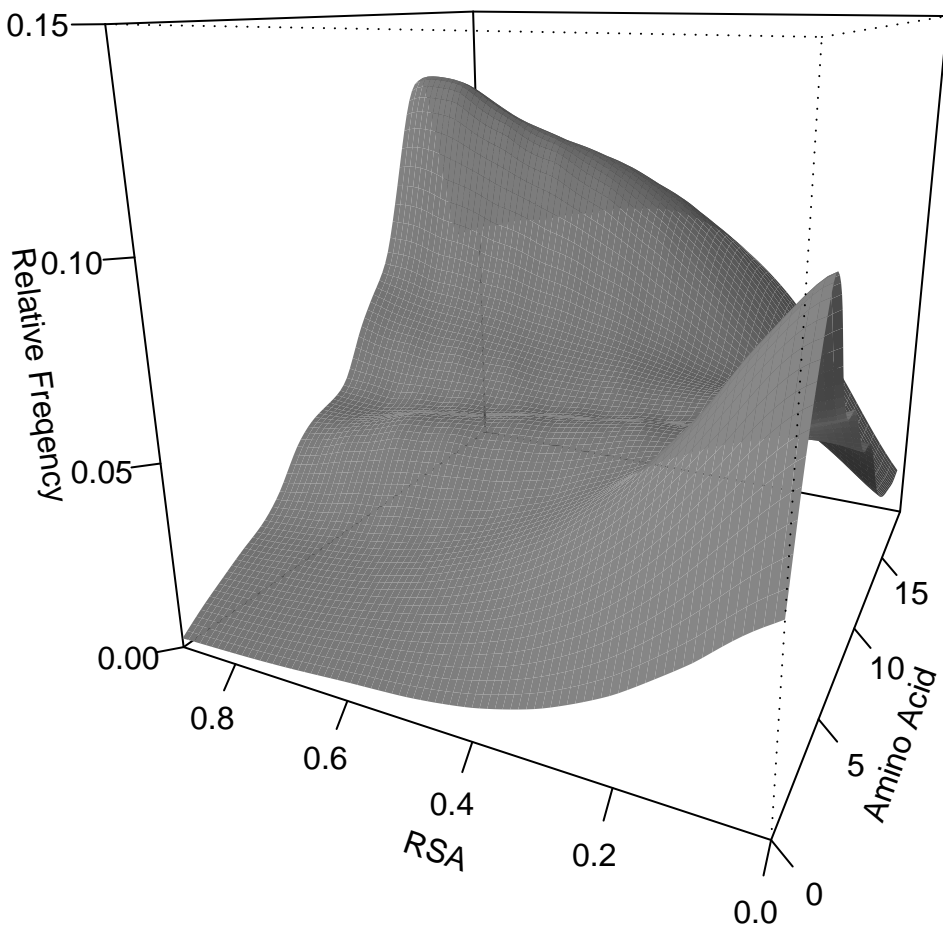

Supplement: files1.zip [file files1.zip]

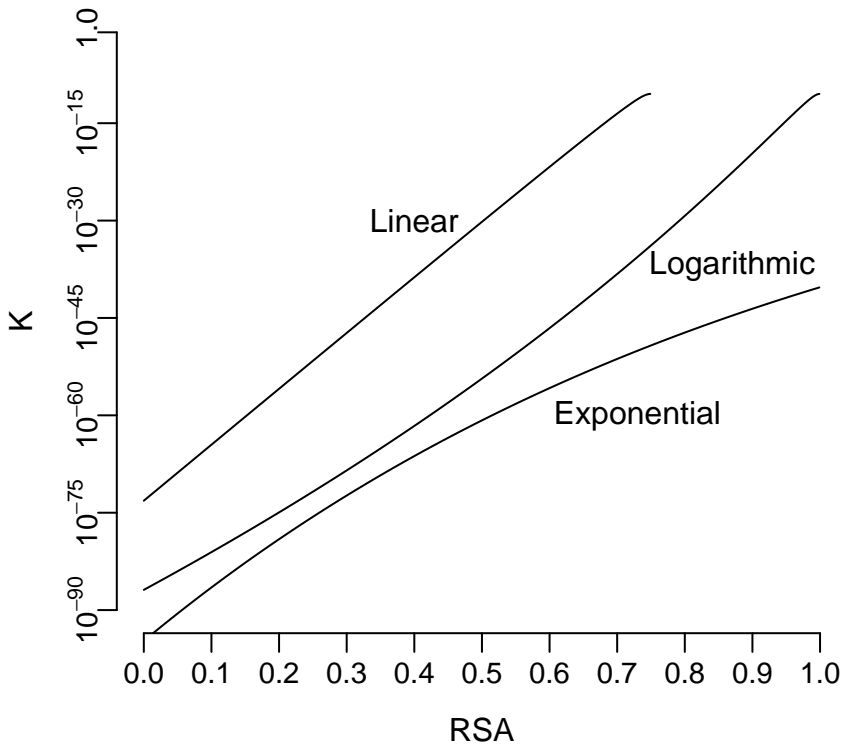

Supplement: files1.zip [file files1.zip]

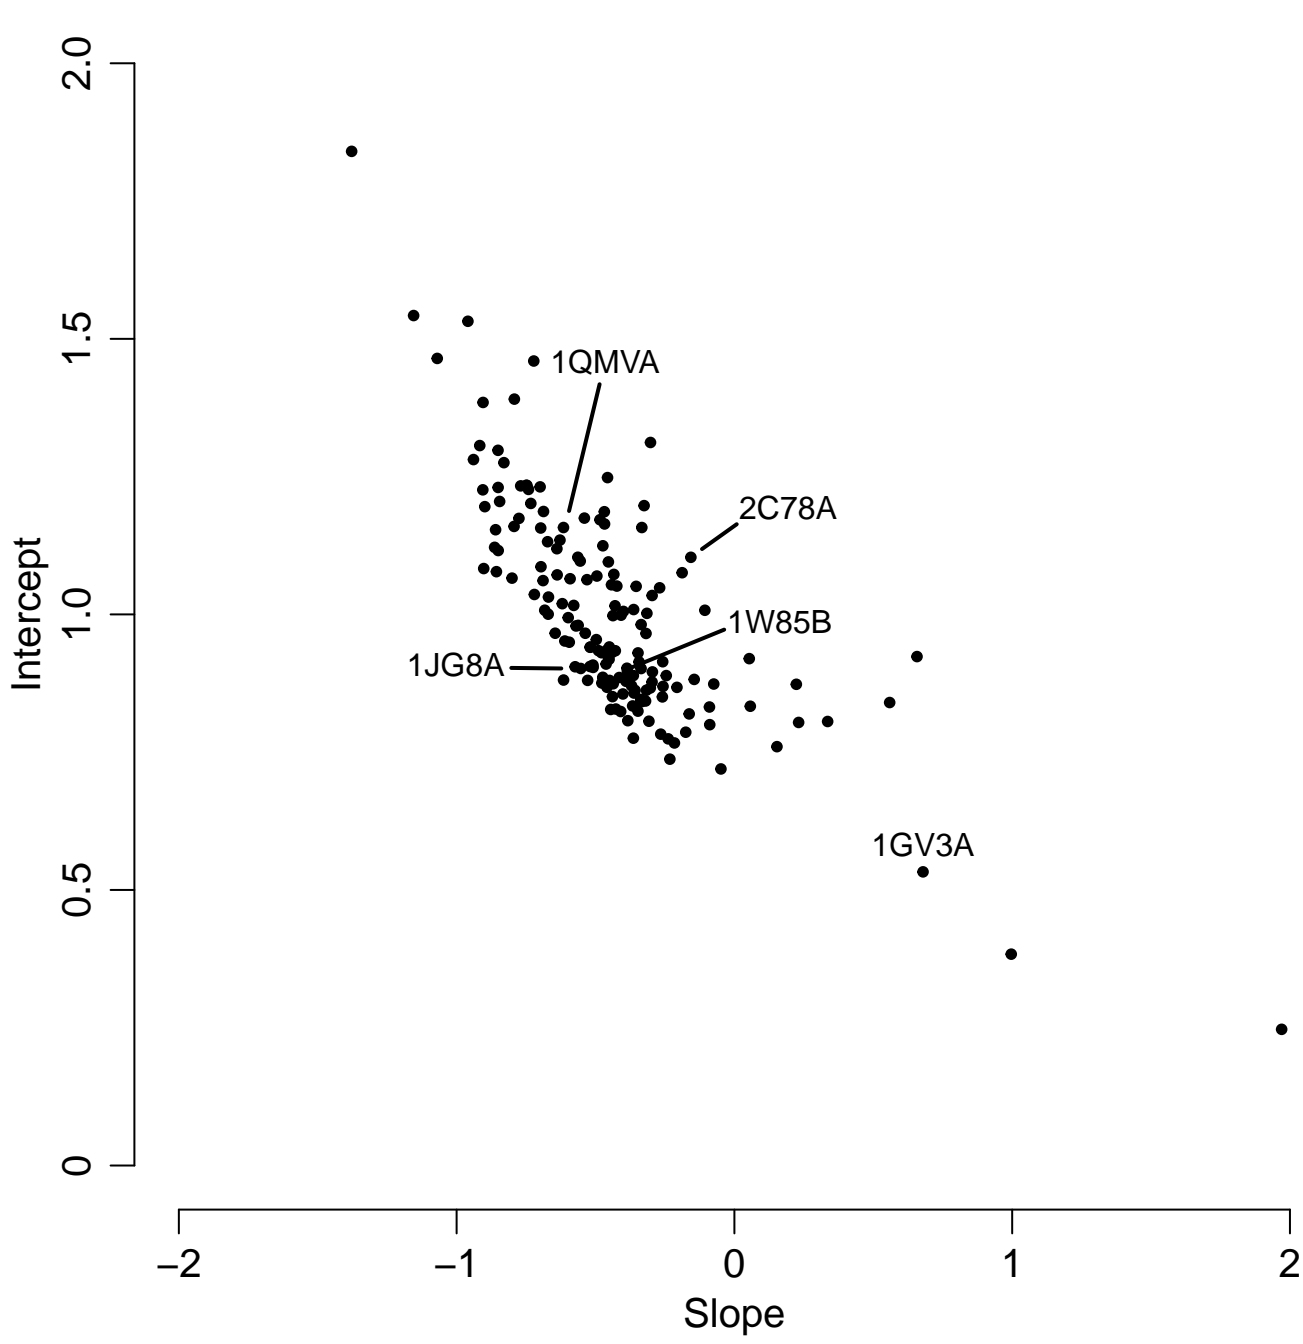

Supplement: files1.zip [file files1.zip]

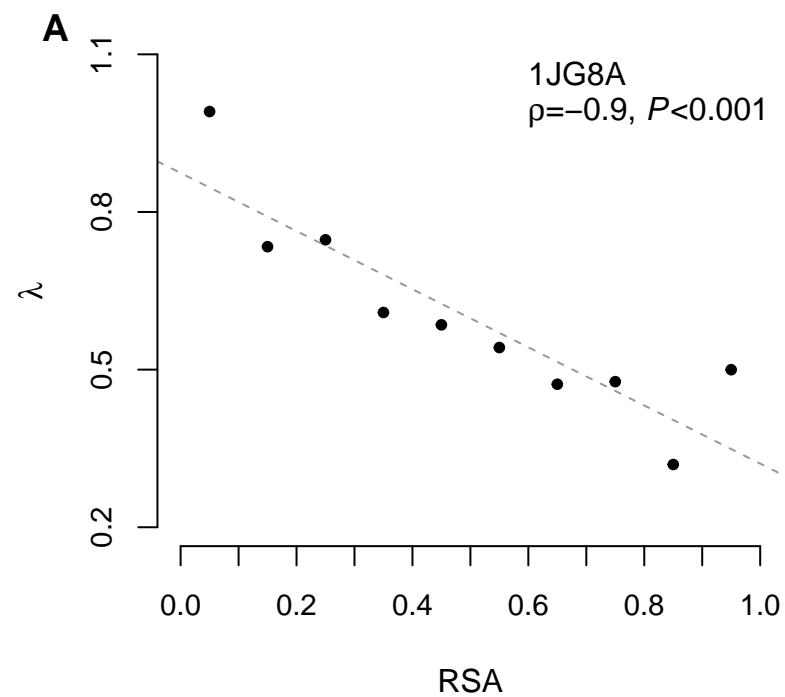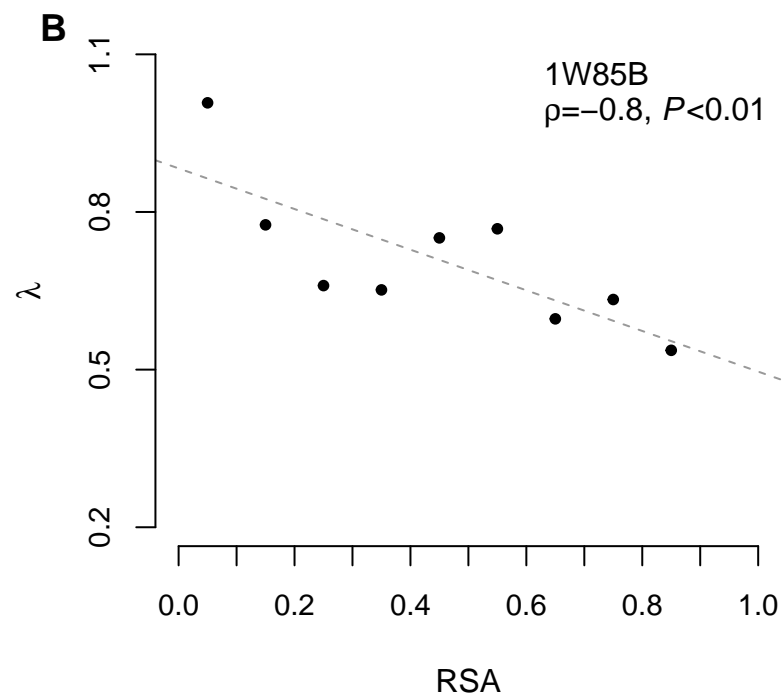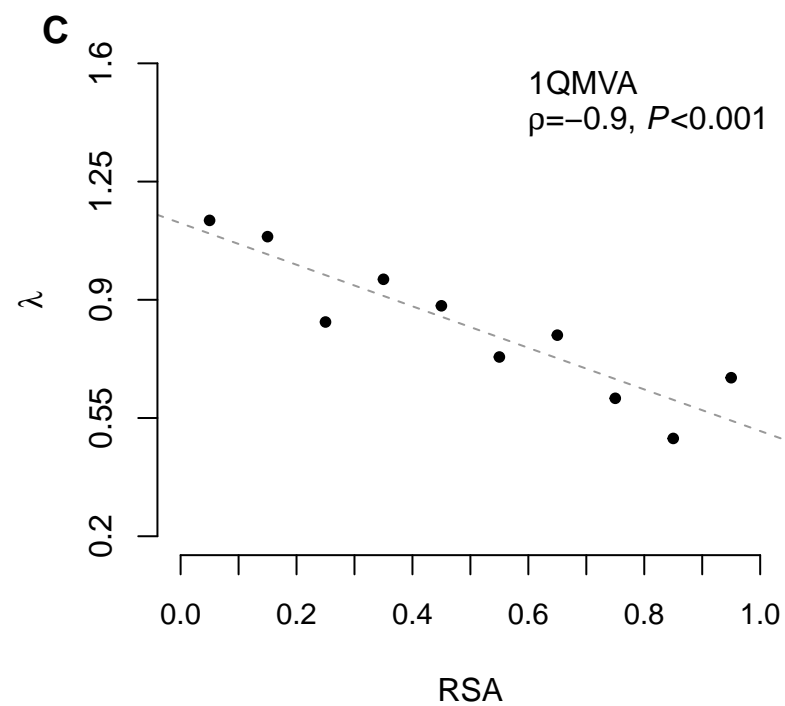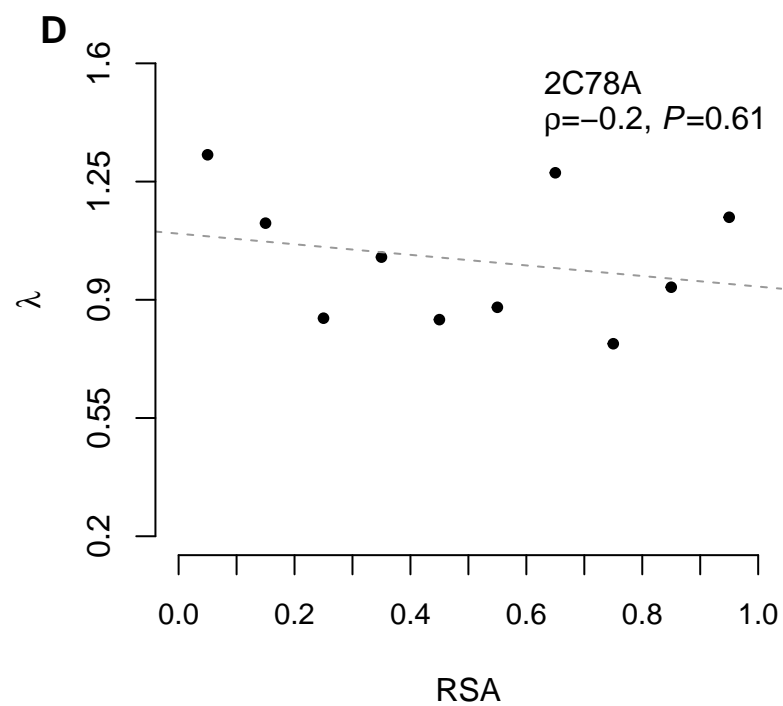

Supplement: files1.zip [file files1.zip]

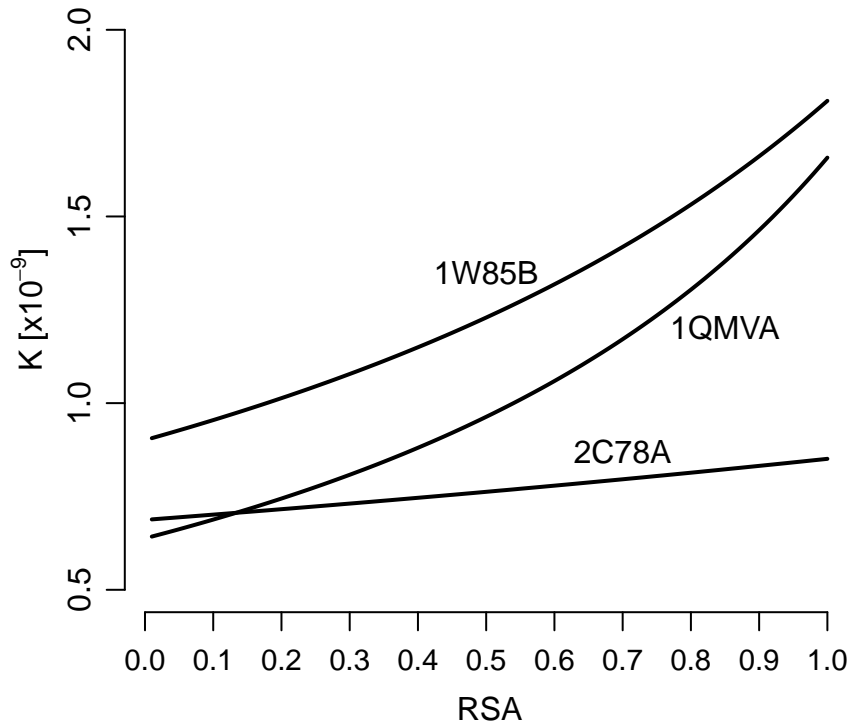

Supplement: files1.zip [file files1.zip]

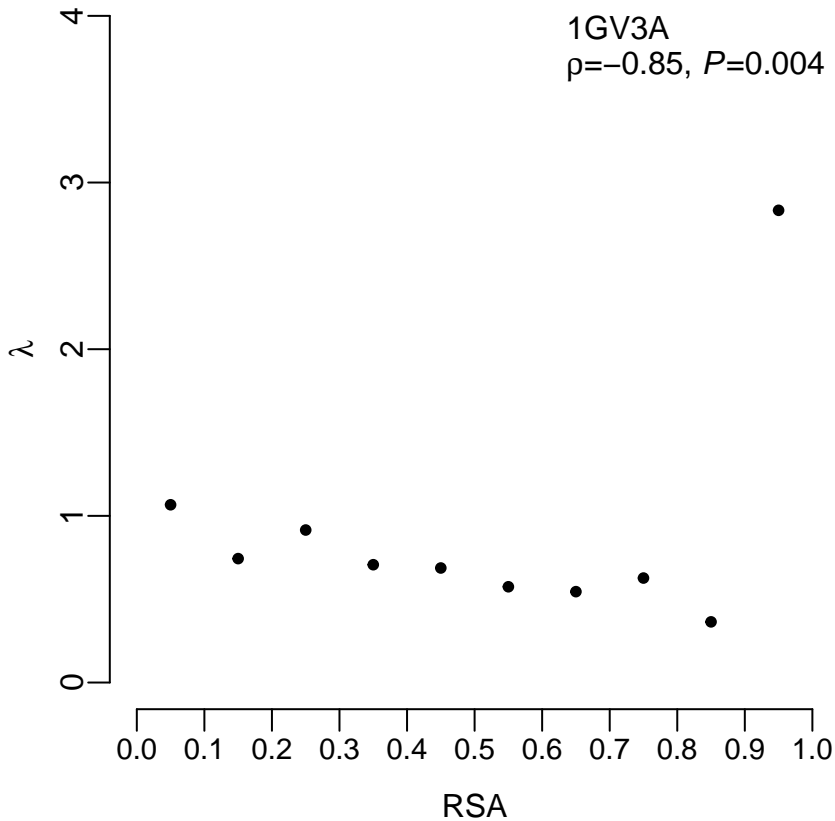

Supplement: files1.zip [file files1.zip]

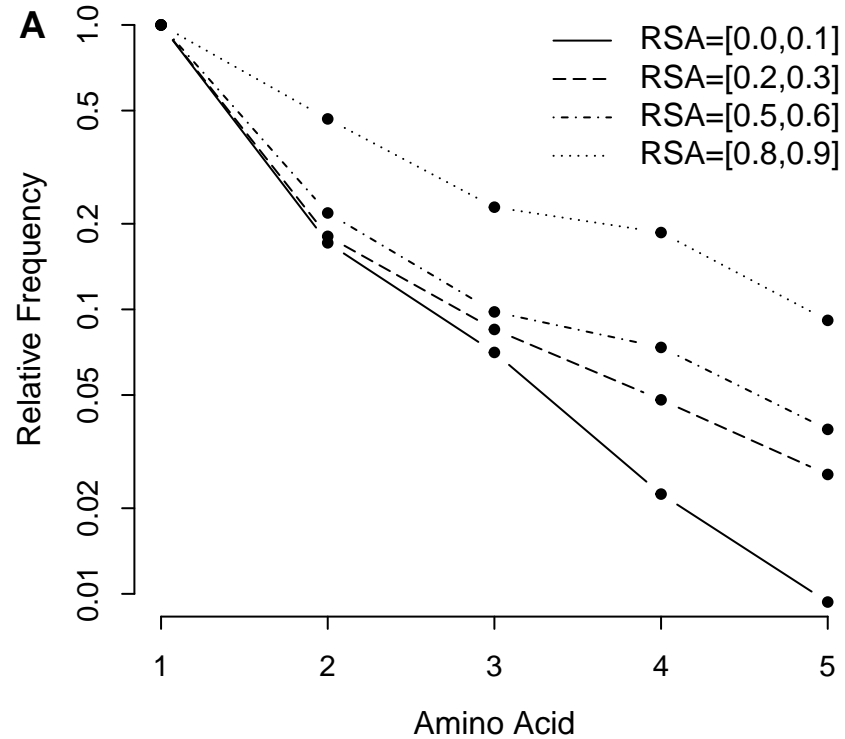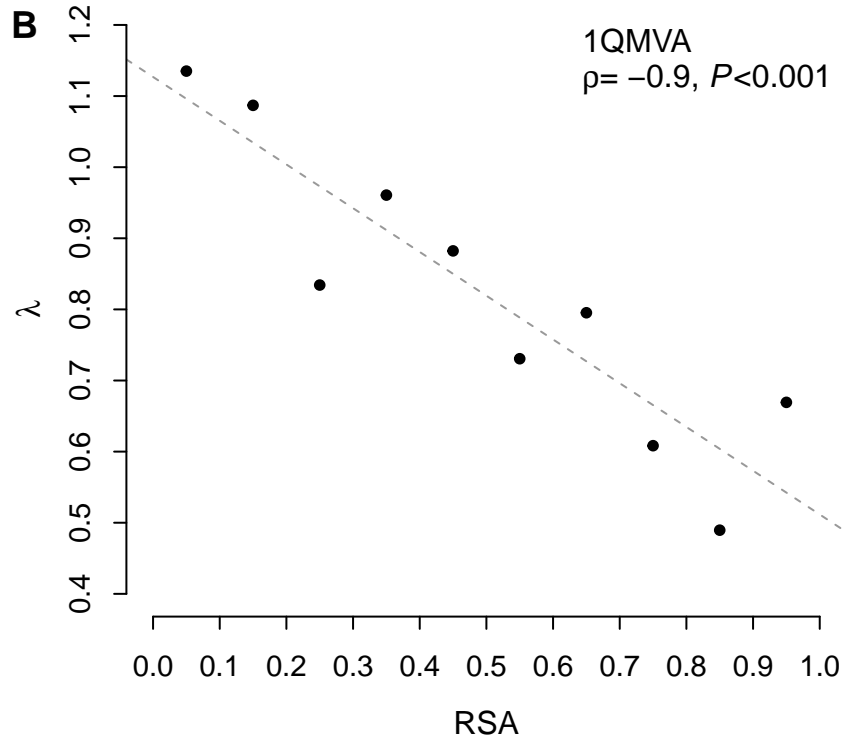

Supplement: files1.zip [file files1.zip]

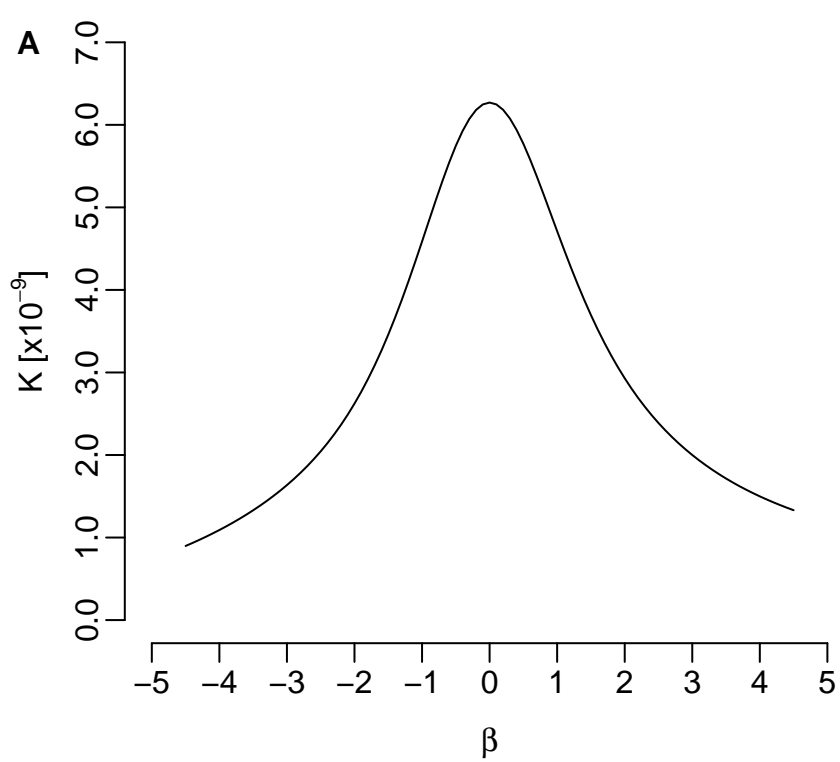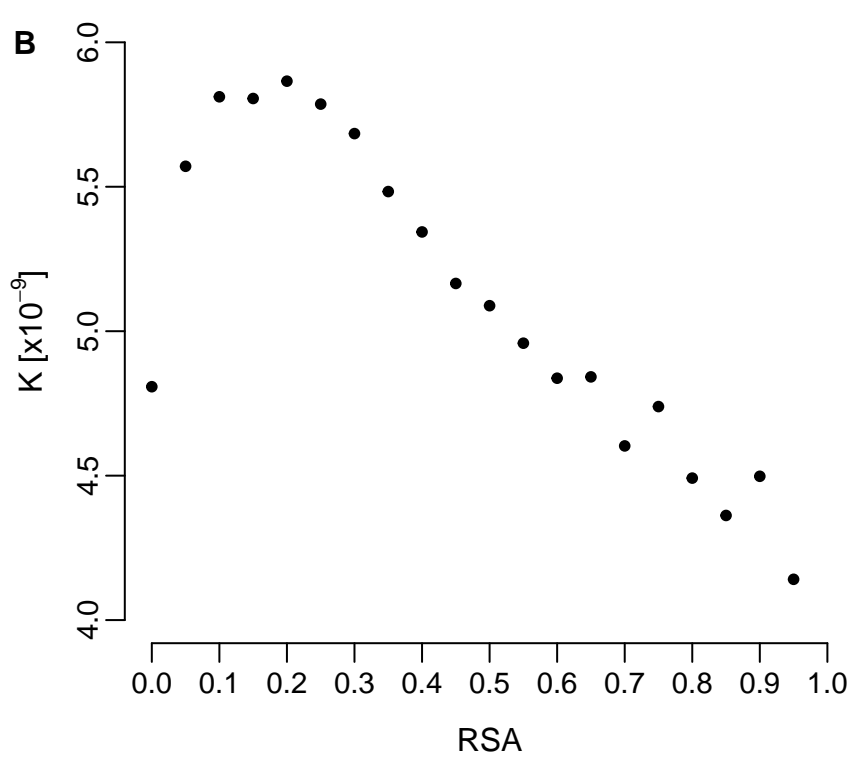

Supplement: files1.zip [file files1.zip]
